# Supplementary material
Source: HighWire-hosted journal article supplement (https://www.cmaj.ca/content/suppl/2010/04/12/cmaj.091130)
Supplement: anti-naiman-1-at.pdf [file anti-naiman-1-at.pdf]

**Appendix 1 (as submitted by the authors): ICD 9 and ICD 10 used for selected cardiovascular, respiratory and control outcomes**

|                    | Condition                             | ICD 9           | ICD 10                  |
|--------------------|---------------------------------------|-----------------|-------------------------|
| Cardiovascular     | AMI                                   | 410             | I21                     |
|                    | Angina                                | 411,413         | I20                     |
|                    | Stroke                                | 433,434,435,436 | I63,I64,I65,I66,G45,G46 |
| Respiratory        | Asthma                                | 493             | J45,J46                 |
|                    | Chronic obstructive pulmonary disease | 490,491,492,496 | J40,J41,J32,J43,J44     |
|                    | Pneumonia/Bronchitis                  | 466, 480-486    | J12-J18, J20            |
| Control Conditions | Appendicitis                          | 540,541,542     | K35, K36, K37           |
|                    | Bowel obstruction                     | 560             | K56                     |
|                    | Acute cholecystitis                   | 575             | K81                     |
